# Supplementary material for: CsPbBr3 perovskite quantum dots/ZnO inverse opal electrodes: photoelectrochemical sensing for dihydronicotinamide adenine dinucleotide under visible irradiation
Source: Royal Society of Chemistry journal article supplement (doi:10.1039/c8dt01790e), 2018-01-01
Supplement: c8dt01790e1.pdf [file c8dt01790e1.pdf]

**CsPbBr<sub>3</sub> Perovskite Quantum Dots/ZnO Inverse Opal Electrodes:  
Photoelectrochemical Sensing for Dihyronicotinamide Adenine  
Dinucleotide under Visible Irradiation**

Yongsheng Zhu, Xinling Tong, Haizhen Song, Yinhua Wang, Zhanping Qiao,  
Dongfang Qiu\*, Jinshu Huang and Zhiwen Lu\*

College of Chemistry and Pharmaceutical Engineering, College of Physics and  
Electronic Engineering, Nanyang Normal University, Nanyang 473061, China.

\*Corresponding authors: [qiudf2008@163.com](mailto:qiudf2008@163.com), [lzw@nynu.edu.cn](mailto:lzw@nynu.edu.cn)

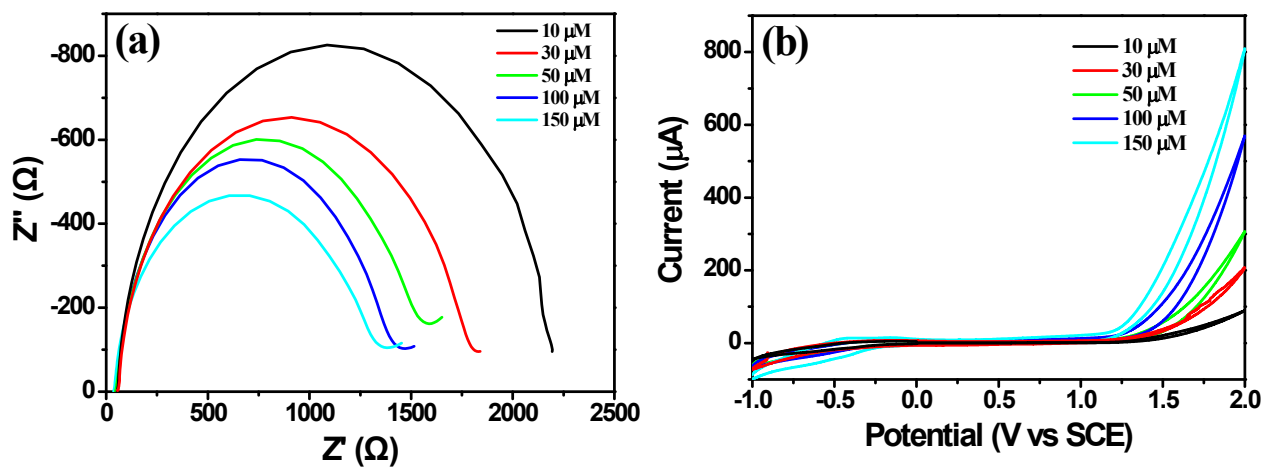

Fig. S1 (a) EIS spectra and (b) CVs of ZnO/CsPbBr<sub>3</sub> composite film in the PBS buffer solution (0.1 M, pH= 7.2) with the different concentration of NADH.
